# Supplementary material for: Invadopodia play a role in prostate cancer progression
Source: Springer Nature journal article supplement (doi:10.1186/s12885-022-09424-4), 2022-04-09

## Raw data Figure 1C

Note the blots were cut prior to probing with E- cadherin and GAPDH - this is a view of the entire membranes

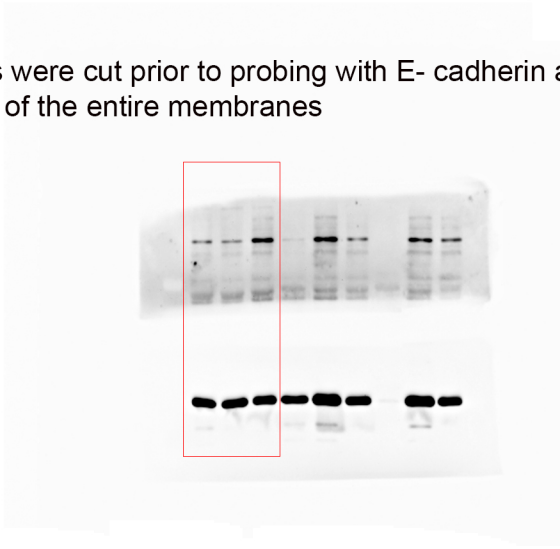

## Raw data Figure 1E

Note the blots were cut prior to probing with N-cadherin and GAPDH - this is a view of the entire membranes

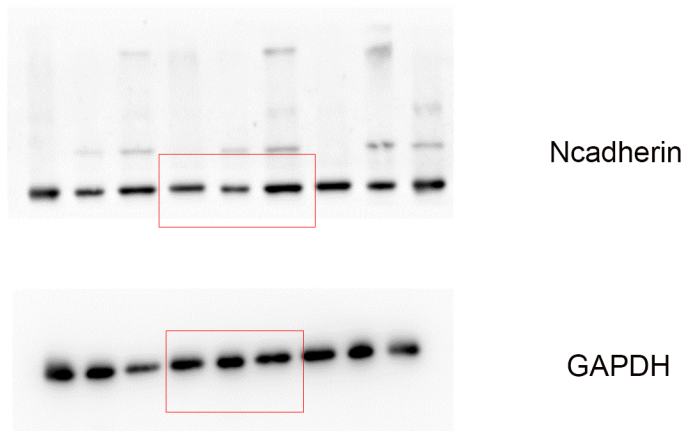

Supplement: MOESM1 [file 12885_2022_9424_MOESM1_ESM.pdf › 12885_2022_9424_MOESM1_ESM.pdf]
